# Supplementary material for: All-inorganic CsPbBr3 perovskite quantum dots embedded in dual-mesoporous silica with moisture resistance for two-photon-pumped plasmonic nanoLasers
Source: Royal Society of Chemistry journal article supplement (doi:10.1039/c7nr08670a), 2018-01-01
Supplement: c7nr08670a1.pdf [file c7nr08670a1.pdf]

# All-Inorganic CsPbBr<sub>3</sub> Perovskite Quantum Dots Embedded in Dual-Mesoporous Silica with Moisture Resistance for Two-Photon-Pumped Plasmonic NanoLasers

Yu Chen<sup>a</sup>, Minghuai Yu<sup>&a</sup>, Shuai Ye<sup>a</sup>, Jun Song<sup>\*a</sup>, Junle Qu<sup>\*a</sup>

\*Corresponding authors

*a. Institute of Optoelectronics, Key Lab of Optoelectronics Devices and systems of Ministry of Education/Guangdong Province, Shenzhen University, Shenzhen, China*

&Yu Chen and Minghuai Yu contributed equally.

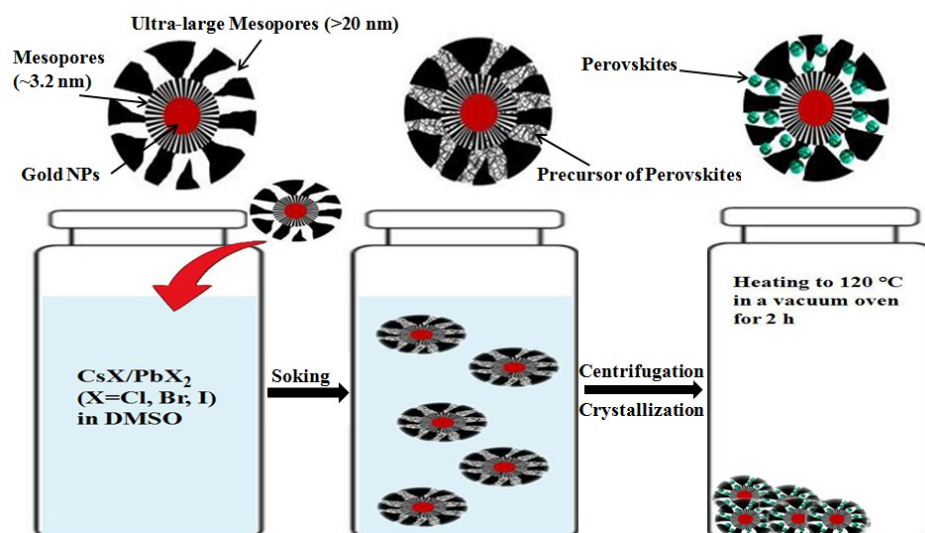

**Figure S1.** Schematic illustration of the preparation process of perovskite QDs embedded in DMS.

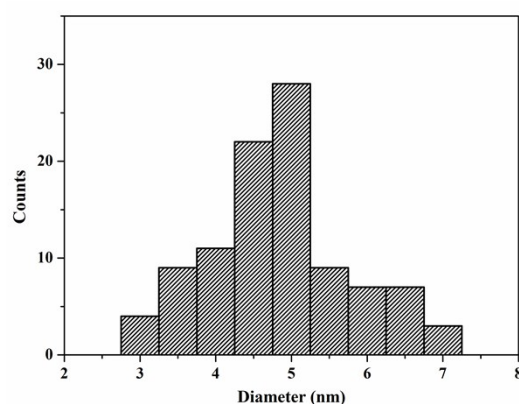

**Figure S2.** The size distribution of the perovskite QDs embedded in DMS.

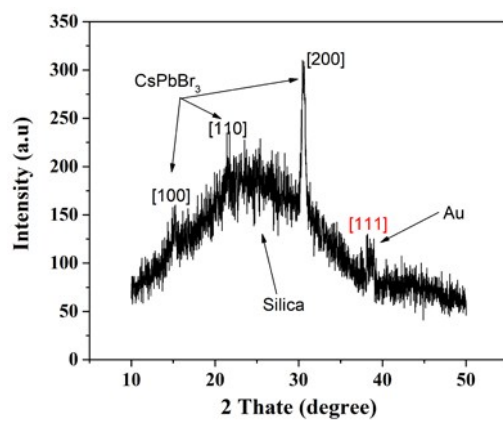

Figure S3. XRD spectrum of DMSP.

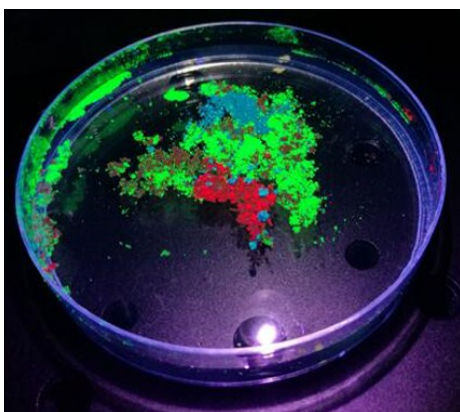

Figure S4. The photographs of Red/Green/Blue DMSP floating on the water.

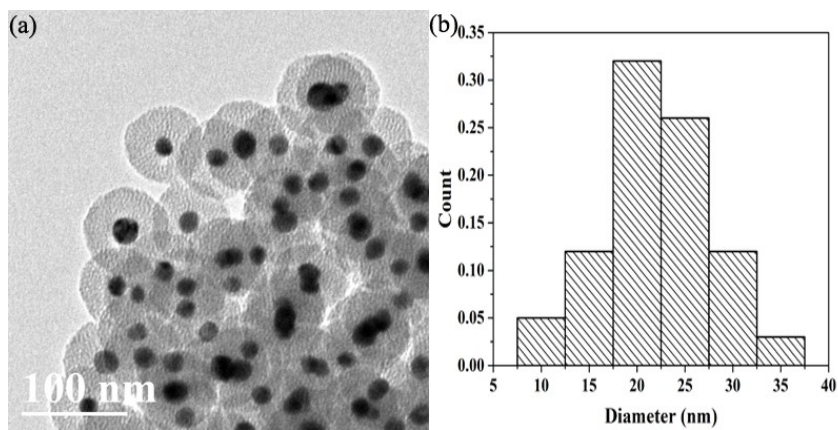

Figure S5. (a)TEM image of Au@CTAB/mSiO<sub>2</sub>. (b) The size distribution of Au nanocore.

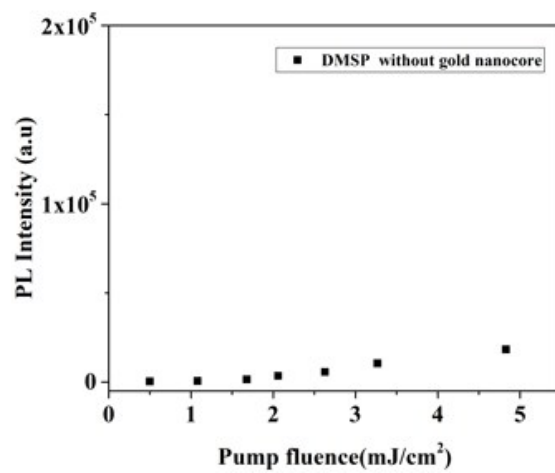

**Figure S6.** The plot of the integrated lasing intensity as a function of pump intensity.
